1 Skill-level based examination of forearm muscle activation  
2 associated with efficient wrist and finger movements during  
3 typing

#### 4 **Keywords**

5 Typing; Upper extremity musculoskeletal disorders (UE-  
6 MSDs); Motion capture system; Electromyography;  
7 Wrist/finger joint movements; Muscle activation

#### 8 **Abstract**

9 This study aims to elucidate the relationship between the  
10 wrist and finger movements and forearm muscle activation of  
11 people with different typing skills. It hypothesizes that skilled  
12 typists (STs) can move their wrist and finger joints faster than  
13 unskilled typists (UTs) can because they can efficiently use  
14 their muscles according to the activity characteristics of the  
15 flexors and extensors of the wrist joint.

16 During the typing task, we measured wrist and finger  
17 movements using a 3D motion capture system and forearm  
18 muscle activation using surface electromyography.

19 The angular velocity of the wrist and finger

20 flexion/extension and the muscle activation of the wrist flexors  
 21 was higher in the STs than that in the UTs while the muscle  
 22 activation of the wrist extensors was higher in the latter than  
 23 that in the former.

24 Our results showed that STs may have used their forearm  
 25 muscles to take advantage of the physical characteristics of the  
 26 keys and the spring characteristics of their muscles and tendons.  
 27 It was suggested that they placed less mechanical stress on their  
 28 finger muscles and tendons when pressing and releasing the  
 29 keys.

30

## 31 **1. Introduction**

32 Computers are essential tools in modern society that we  
33 frequently use for long periods when working or studying.  
34 Most people, regardless of age, gender, or occupation, are  
35 required to use computers, with the continuing expansion of  
36 digital transformation. Typing is a particularly complex task  
37 that relies on many joints and muscles. During typing, finger  
38 movements are usually rapid and repetitive and people hold  
39 their hands continuously above the keyboard, exposing the  
40 tendons and sheaths of their wrist and fingers to mechanical  
41 stress (Keller et al. , 1998).

42 Bergqvist et al. (1992) first reported a prospective study  
43 wherein typing work induced the risk of upper extremity  
44 musculoskeletal disorders (UE-MSDs) of the wrist and finger  
45 joints (Bergqvist et al. , 1992). In the next largest prospective  
46 study, 21% of workers who used computers for more than 15 h/  
47 week developed wrist or finger-related disorders in 1 year, most  
48 of which were tendon disorders (Gerr et al. , 2002). In a recent  
49 review, a dose–response relationship was plotted between the

50 exposure of people to mechanical factors and the risk of UE-  
51 MSDs associated with their wrists and finger tendons (Keir et  
52 al. , 2021). Therefore, it is necessary to investigate how the  
53 overuse of wrists and fingers may contribute to the  
54 development of UE-MSDs.

55 In this context, typing is required in bodily kinesthetic  
56 learning to avoid overloads on wrist and finger joints and UE-  
57 MSDs, such as sports injuries. Previous research on typing  
58 proficiency and physical movements has mainly focused on  
59 skilled typists (STs) of high skill. Additionally, few studies  
60 have assessed the kinematic properties of the wrist and finger  
61 joints, even though typing primarily comprises wrist and finger  
62 movements (Alizadehkhayat and Frostick, 2015, Eygendaal et  
63 al. , 2007).

64 To quantify the complex kinematic properties of wrists  
65 and fingers during typing, it is necessary to understand their  
66 structural characteristics and properly evaluate the coordination  
67 between them. The relationship between the synergistic motion  
68 of the wrist and finger joints in the sagittal plane is called the

69 tenodesis function (Cabri et al. , 2009, Marta et al. , 2012). It  
70 refers to when passive finger joint flexion is induced during  
71 wrist joint extension; and conversely, finger joint extension is  
72 induced during wrist joint flexion (Cooney et al. , 1989, Horii  
73 et al. , 1992). Particularly, the muscle tension of the finger joint  
74 does not increase excessively and the amount of tendon  
75 extension can be increased during wrist joint flexion. In this  
76 context, evaluating only the movements of the wrist or finger  
77 joint and related muscle activities may lead to a  
78 misinterpretation of the mechanical activation of the body.  
79 Therefore, the relationship between hand kinematic  
80 coordination and muscle activities needs to be properly  
81 assessed and the biomechanical risk factors that arise need to  
82 be determined. Previous studies have discussed hand and finger  
83 kinematics by analyzing the simple tapping of an index finger.

84 In this study, we evaluated repeated keystroke motions  
85 during typing to analyze wrist and finger kinematics during  
86 more complex repetitive motions. Movement styles may vary  
87 with proficiency because typing is a complex task controlled by

many joints and muscles. This study aims to elucidate the relationship between wrist and finger movements and forearm muscle activation for different typing skills. We hypothesized that STs could move their wrists and fingers more efficiently than unskilled typists (UTs) could. The movement of their muscles depends on the characteristics of the flexor and extensor activities at the wrist joint.

## 2. Methods

### 2.1 Subjects

Twelve healthy subjects (nine men and three women) participated in this experiment; they were all right-handed. All the subjects provided written informed consent, according to the Declaration of Helsinki, after receiving a detailed explanation of the purpose of the study and the risks involved. This study was approved by the Ethics Review Committee (approval number: 20,508).

### 2.2 Measurement settings

A PC monitor and QWERTY keyboard (Microsoft, Wired Keyboard 600 ANB-00040, Washington, USA) were

107 placed at a height of 70 cm on a desk. Before beginning the  
108 tests, each subject adjusted the chair according to their  
109 preferences. We used a 3D motion capture system (Vicon  
110 Motion Systems Ltd., Vicon, Oxford Metrics PLC, London,  
111 UK; sampling frequency: 100 Hz) and wireless multipoint  
112 surface electromyography (EMG) (DELSYS, Delsys Trigno  
113 Wireless System, Massachusetts, USA; sampling frequency:  
114 1,000 Hz).

### 115 ***2.3 Procedure***

116 We measured the height and weight of each subject and  
117 collected the other necessary physical information for the  
118 experiment. Infrared-reflecting markers (diameters 4 and 14  
119 mm) were attached to points on the subjects (Fig. 1)—  
120 according to the Vicon plug-in-gait full-body (PIG) and wrist  
121 and finger joint models (Baker et al. , 2007, Cook et al. , 2007)  
122 —to calculate the sagittal plane of the wrist and the angular  
123 velocity of the metacarpophalangeal joint (MCP) of the index  
124 finger.

125 Surface EMG sensors were attached to the right side of

126 the flexor carpi radialis (FCR), flexor carpi ulnaris (FCU), both  
127 as the term extensor carpi radialis (ECR), and extensor carpi  
128 ulnaris (ECU). The strength of each muscle was measured  
129 using maximum voluntary isometric contraction (MVC).

130 Each subject practiced typing for 5 min before the  
131 experiment to become accustomed to the test environment.  
132 During the practice trial, each subject adjusted the height of the  
133 chair and the angle of the monitor according to their preference.  
134 The typing skills of the subjects were pretested on an electronic  
135 keyboarding program (e-typing, e-typing Co., Ltd., Aichi,  
136 Japan; <http://www.e-typing.ne.jp>), which had a text display with  
137 text that moved as each subject typed.

138 In the typing test, we instructed the subjects to begin the  
139 task after confirming that their hands were placed on the  
140 keyboard. All the subjects typed the same sentences—each  
141 comprising approximately 5,000 Japanese characters—that  
142 were displayed on the monitor. No instructions were provided  
143 regarding the typing speed, rhythm, or time limit; all the  
144 subjects typed according to their regular style and pace. Each



145 subject performed the task thrice, with short pauses in between.

146

## 147 ***2.4 Data processing***

148 The wrist joint angle was calculated from markers  
149 attached to the metacarpal head of the index finger, radial  
150 styloid process, ulnar styloid process, and forearm in the model  
151 (Fellinger et al. , 2010). We expressed that the positive value  
152 was the extension and that the negative value was the flexion  
153 angle of the wrist joint. The MCP joints were used to define the  
154 hand as a rigid body, and the angle of the proximal phalanx  
155 segment of the hand on the sagittal plane was calculated and  
156 used as the flexion/extension angle (Fig. 1). We expressed that  
157 the positive value was the flexion angle and that the negative  
158 value was the extension angle for the MCP angle. The 4 mm  
159 marker was attached to the enter key on the keyboard to record  
160 the typing time and calculate the analysis interval.

161 The kinematic data were filtered using a fourth-order  
162 Butterworth low-pass filter with a cut-off frequency of 6 Hz.  
163 After filtering the data, the mean joint angle, changes in the

164 joint angle based on the root mean square (RMS), and joint  
165 velocity of the wrist and MCP joint were calculated for each  
166 trial.

167 The EMG data were passed through a fourth-order  
168 Butterworth bandpass filter with a cutoff frequency of 20–480  
169 Hz; the filter was full-wave rectified and smoothed at 10 Hz.  
170 The maximum voluntary contraction (MVC) normalization  
171 technique was applied to the EMG data obtained during the  
172 typing sessions.

173 The 3D motion capture system was used to capture the  
174 timing of the first end of the descent of the marker, and the  
175 timings of the key input signal and start of the EMG data  
176 recording were synchronized in time. The analysis interval was  
177 sampled between the first and last entries of the task sentences.

## 178 ***2.5 Data analyses***

### 179 ***2.5.1 Grouping by the pretest results***

180 All data were obtained using Nexus 2.9 (Vicon Motion  
181 Systems Ltd., Vicon, Oxford Metrics PLC, London, UK) and  
182 Python 3.7 (Python Software Foundation, Beaverton, Orlando,

183 USA). The accuracy (%) and typing speed (words per minute,  
184 WPM) in Japanese for all the subjects in the pretest were  
185 obtained, where accuracy is the percentage of number of keys  
186 that can be inputted without any mistakes. In a study  
187 investigating the keystroke characteristics of both typing  
188 novices and experts (Takaoka et al. , 2014), both were  
189 classified as having a correct response rate of 95% or higher or  
190 rates close to it, reaching the required condition for  
191 employment.

#### 192 *2.5.2 Kinematic data of wrist and metacarpophalangeal joints*

193 The mean and SD values of the flexion/extension angles  
194 of the wrist and MCP flexion/extension angles of the index  
195 finger were calculated to analyze the average posture of the  
196 wrist and MCP joints during the analysis interval. Similarly, the  
197 mean and standard deviation (SD) of the RMS of the data were  
198 calculated. The angular velocities of the wrist and index finger  
199 MCP joints were investigated by calculating the mean and SD  
200 values of the changes in the angles/s .

#### 201 *2.5.3 Analysis of muscle activation in the forearm*

202           To investigate the muscle activation in each forearm  
203   muscle, we used amplitude probability distribution function  
204   (APDF) analysis for the time series data of %MVC. APDF  
205   analysis is a method that expresses the percentage of the total  
206   time that the output is below a certain level as the probability of  
207   occurrence ( $P$ ) for that output when the EMG is being  
208   measured (Jonsson, 1982). Based on these probability values,  
209   the muscle activities can be classified into the static activity  
210   level, which is equivalent to the activity involved in static  
211   posture holding or pausing movement ( $P = 0.1$ ); the average  
212   activity level, which is exhibited throughout the movement ( $P$   
213    $= 0.5$ ); and the maximum activity level, which is equivalent to  
214   the maximum activity exhibited during the movement ( $P = 0.9$ ).  
215   After plotting the function of the power output and appearance  
216   probability of each muscle of each subject in each trial, we  
217   calculated the mean and SD values of the muscle activation at  
218    $P = 0.1, 0.5$ , and  $0.9$ .

#### 219   2.5.4 Identification of press and release times

220           From analyzing the key input signals of the subjects, we

221 obtained the time at which the input of each key started and  
 222 ended. The time at which the “U” key was pressed, which is the  
 223 start of the input, was defined as the press time; and the time at  
 224 which the fingertip left the “U” key, indicating the end of the  
 225 inputs, was defined as the release time. The mean and SD  
 226 values of each data point were calculated and compared  
 227 between the two groups.

## 228 **2.6 Statistics**

229 After confirming the normality of all the kinematic and  
 230 muscle activity data using the Shapiro–Wilk test, we  
 231 investigated the homoscedasticity of the data using the F-test.  
 232 Since there was no difference in the EMG and kinematic data  
 233 in each trial (confirmed by one-way ANOVA;  $P < 0.05$ ), the  
 234 average values of the three trials were used as representative  
 235 values. The data of the two groups were compared using the  
 236 unpaired t-test ( $P < 0.05$ ) or Wilcoxon signed-rank test.

## 237 **3. Results**

### 238 **3.1 Subjects and environments**

239 The mean accuracy (SD) values in the typing test are

240 shown in Table 1. The mean value of the WPM typed by all the  
241 subjects was used as the benchmark for measuring the skill  
242 level; subjects who achieved scores higher and lower than the  
243 mean were classified into the ST and UT groups, respectively.

244 The mean (SD) age, height, weight, hand width, finger  
245 length, male-to-female ratio, chair height, and screen angle  
246 values are presented in Table 1. The ratio of subjects that used  
247 desktop to notebook PCs daily was 1:11. The mean (SD) values  
248 for the frequency and duration of computer use were 5.2 (1.2)  
249 times per week and 3.3 (1.8) h per day, respectively. There  
250 were no significant differences between the two groups in any  
251 of the data.

### 252 ***3.2 Wrist and metacarpophalangeal joint motion***

253 There was no significant difference in the mean  
254 extension angle of the wrist joint at the beginning of the typing  
255 motion between the two groups. The mean values (SD) of the  
256 wrist joint extension angle, RMS, and angular velocity are  
257 shown in Fig. 2. The angular velocity of the flexion/extension  
258 was predominantly higher in the ST group ( $P = 0.003$ ) than that

259 in the UT group.

260 The mean (SD) values of the flexion angle, RMS, and  
261 angular velocity of the MCP joint of the index finger are shown  
262 in Fig. 2. The mean angular velocity of the MCP joint in the ST  
263 group was significantly higher than that in the UT group ( $P =$   
264 0.002). The mean values (SD) of %MVC of FCR, FCU, ECR,  
265 and ECU at the static activity level ( $P = 0.1$ ), mean activity  
266 level ( $P = 0.5$ ), and maximum activity level ( $P = 0.9$ ) are  
267 shown in Fig. 3. The mean %MVC of FCR at  $P = 0.9$  was  
268 significantly higher than that in the ST group ( $P = 0.023$ ). The  
269 mean %MVC of ECR at  $P = 0.1, 0.5, 0.9$  were significantly  
270 higher than that in the UT group at  $P = 0.040, 0.020$ , and  $0.020$ ,  
271 respectively.

### 272 ***3.3 Data on press and release time***

273 The means (SD) of the press and release times were 0.12  
274 (0.02) and 0.20 s (0.14), respectively. The press and release  
275 times of the ST group were 0.13 (0.01) and 0.11 s (0.01),  
276 respectively. The press and release times of the UT group were  
277 0.11 (0.02) and 0.26 (0.15), respectively. There were no

278 significant differences between the two groups. The mean  
279 values (SD) of the wrist joint extension angle, angular velocity,  
280 flexion angle of the MCP joint of the index finger, and angular  
281 velocity during the press and release times are shown in Figs. 4  
282 and 5. The mean angular velocity of the wrist joint extension  
283 during the release time in the ST group was significantly higher  
284 than that in the UT group ( $P = 0.005$ ). The mean value of the  
285 angular velocity of the MCP joint flexion/extension of the  
286 index finger during the press and release times in the ST group  
287 was significantly higher than that in the UT group ( $P = 0.002$ ,  
288  $0.006$ ).

289 The mean values (SD) of the %MVC of the FCR, FCU,  
290 ECR, and ECU during press and release are shown in Figs. 4  
291 and 5. The mean values (SD) of the %MVC of the ECR during  
292 the press time of the ST group were significantly lower than  
293 those of the UT group ( $P = 0.020$ ).

#### 294 **4. Discussion**

295 We hypothesized that the subjects of the ST group could  
296 move their wrist and finger joints faster than those of the UT



group could because they could use their muscles according to the activity characteristics of the flexors and extensors of their wrist joint. The ST group had a higher muscle activation at the maximum activity level of the FCU, whereas the UT group had a higher muscle activation at all the ECR activity levels. The subjects of the ST group also moved the MCP joints of their wrists and index fingers faster than those of the UT group did. The press and release time results clearly explained the muscle activation and kinematics of the subjects during the experiment. This study revealed that repetitive keystrokes with muscle activity controls for efficient wrist and finger movements reduced muscle activation during typing. This study emphasizes the significance of assessing not only muscle activity but also the complementary movements of the wrists and fingers simultaneously when considering muscle activation and the risks associated with UE-MSDs during typing.

#### 4.1 Muscle activation and movement during experiment

The maximum activity level of the FCR ( $P = 0.9$ ) was higher in the ST group. This value is an index of the peak level

316 of muscle activity involved in the task performance (Szeto et  
317 al. , 2009); it refers to the muscle activity acting on the pressed  
318 keys during typing.

319 Key presses are coordinated by the muscle activities of  
320 the wrist and finger flexors (Dennerlein et al. , 2007).  
321 Additionally, because the finger flexors were stretched in the  
322 wrist extension posture, the mechanical stress on them and the  
323 tendons may have increased if active tension was generated in  
324 the stretched state when pressing the keys. Therefore, the  
325 controlled muscle activity of the ST group may be attributed to  
326 the increase in the peak level of muscle activity in the wrist  
327 flexors, thereby decreasing the muscle load and mechanical  
328 stress on the finger flexors.

329 All the ECR activity levels ( $P = 0.1, 0.5, \text{ and } 0.9$ ) were  
330 higher in the UT group. Static activity level is an index of  
331 muscle activity related to maintaining a static posture  
332 (Simoneau et al. , 2003); it was inferred that the muscle activity  
333 was inefficiently controlled due to static posture and the highly  
334 antagonistic action of the finger flexor when pressing the keys.

## 335 ***4.2 Kinematics of wrist and finger joints during experiment***

336 No significant differences were observed in the extension  
337 angle and RMS of the wrist between the ST and UT groups.  
338 However, the angular velocity of flexion/extension was higher  
339 in the ST group than that in the UT group. The kinematic  
340 parameters of the MCP joint of the index finger showed no  
341 significant differences in the joint angle and RMS. The higher  
342 typing speed of the ST group was due to the fast movements of  
343 the wrist and finger joints and coordinated fast actions of the  
344 joints.

345 To move the wrist and finger joints efficiently, it is  
346 important to convert variables, such as inertia and gravity, into  
347 joint movements (Dennerlein, Kingma, 2007, Qin et al. , 2014).

348 As mentioned in 4.1, the ST group had muscle  
349 coordination that increased and decreased the FCR and ECR  
350 muscle activities, respectively. This may have allowed the ST  
351 group to maintain the downward inertial force generated in the  
352 fingertip immediately before pressing the keys and reduced the  
353 braking action. As a result, the joint angular velocity of the

354 wrist and finger when pressing the keys was higher in the ST  
355 group.

356 Additionally, the ST group performed muscle activity  
357 control to reduce the ECR muscle activity during the  
358 experiment. This indicated that the ST group effectively used  
359 the spring action of the finger flexors to support the movement  
360 of the fingertips in resisting gravity during the transition from  
361 pressing the keys to releasing them. This inference also  
362 indicated the existence of a relationship between the fast  
363 movements of the wrist and finger joints.

#### 364 *4.3 Muscle activation and movement when pressing and* 365 *releasing keys*

366 We evaluated the muscle activation of the wrist joint  
367 during press and release times. The types and combinations of  
368 fingers that a person uses while typing vary by skill; however,  
369 the number of typists that do not use the index finger is small  
370 (Feit et al. , 2016). Additionally, the "U" key was most  
371 frequently entered using the right index finger, because vowels  
372 (a, e, i, o, u) in Japanese are always entered after the

373 consonants.

374       The two groups showed similar activations of the wrist  
375 flexors (FCR and FCU) during the task and muscle activities  
376 during the press and release times. The ST group was also able  
377 to perform finger and wrist joint movements faster than the UT  
378 group could. Since the flexion movements of the MCP joint  
379 during the typing movements were synergistic with those of the  
380 wrist joint (Dennerlein, Kingma, 2007), it can be assumed that  
381 the ST group took advantage of the excessive muscle activity  
382 of the wrist flexors during keystrokes. Additionally, because the  
383 fingertips were in high-speed contact with the keys when  
384 pressing them, the wrist flexors may have acted excessively to  
385 maintain the posture of the hand against the reaction force from  
386 the keys. Finger flexor activity is activated after the onset of  
387 downward finger movement (Kuo et al. , 2006); the ST group  
388 may have activated their wrist flexors in a coordinated manner.  
389 The ST group used this strategy because it increased the kinetic  
390 energy of their fingertips immediately after pressing the keys,  
391 producing a key release, which facilitated keystroke switching.

392           Wrist posture affects muscle strength and activation  
393   patterns (Visser et al. , 2000), and sustained low-intensity  
394   muscle activity has been associated with wrist extension  
395   postures during typing (Dennerlein and Johnson, 2006) with the  
396   wrist extensor muscle activity decreasing as the extension angle  
397   of the wrist decreases (Simoneau, Marklin, 2003), possibly  
398   because of changes in the muscle length and moment arm.

399           In this study, there was no difference in the angle of the  
400   wrist joint or the degree of change in the angle between the two  
401   groups; however, the muscle activation of the static activity  
402   level of the ECR, an extensor muscle of the wrist joint, was  
403   significantly higher in the UT group than that in the ST group.  
404   This may be due to the over-activation of the ECR in the UT  
405   group due to the lack of minimal muscle activity control  
406   despite the longer moment arm of the muscle. This action is  
407   antagonistic to the flexion movement of the finger and,  
408   therefore, may increase the muscle load on the finger flexors  
409   when pressing the keys.

410           Furthermore, the ECU muscles cause the hand to be

411 raised after pressing the keys (Dennerlein, Kingma, 2007). The  
 412 UT group could not efficiently utilize the spring properties of  
 413 the finger flexor tendons, resulting in the overuse of the  
 414 muscles acting on the extensor muscles of their wrist joint  
 415 when lifting their fingertips. This may have increased the EMG  
 416 load on the ECU muscles when releasing the keys. Additionally,  
 417 there is a proportional relationship between the distance of the  
 418 spatial movement of the hand after key release and the time  
 419 interval before the next keystroke (Feit, Weir, 2016). Therefore,  
 420 the UT group, which tended to have longer key release times,  
 421 may have increased the muscle load on the ECU muscles  
 422 during key release because of excessive attempts to lift and  
 423 move the hands.

#### 424 ***4.4 Limitations***

425 The measurement conditions in this study were not strict.  
 426 The postures of the subjects were not constrained during the  
 427 test; they could place their forearms on the desk or keep them  
 428 floating. Since placing the forearm on the desk may decrease  
 429 the activation of the extensor muscles of the wrist joint, the

430 distance between the upper body and the keyboard and the  
431 space on the desk in front of the keyboard needs to be checked  
432 at the beginning of the measurement; and the effects of  
433 differences in the contact time and contact area between the  
434 desk and the forearm on the body during the task should be  
435 determined.

436 In this study, we examined the differences in the physical  
437 parameters of skill levels among healthy adult students.  
438 Therefore, the findings of this study cannot be generalized  
439 completely.

440 The press time and release time were used as the analysis  
441 intervals, and the index finger movements were analyzed  
442 thoroughly. However, we could not confirm which finger each  
443 subject used to input the “U” key. Thus, we may not have been  
444 able to exclusively evaluate the movement of the index finger.

445 Furthermore, because we did not measure the force  
446 exerted by the fingertip during keystrokes, we could not  
447 demonstrate a direct relationship between the angular velocity  
448 of the MCP joint and the actual force generated during



449 keystrokes. In future investigations, we intend to evaluate the  
450 movements of fingers other than that of the index finger and  
451 examine the relationships between changes in the posture,  
452 muscle activation, and the force exerted by fingertips during  
453 specific keystrokes.

## 454 **5. Conclusions**

455 The velocity of the wrist and finger joints and muscle  
456 activation of the forearm during typing differed according to  
457 the skill level of the subjects, and it was inferred that these  
458 differences were caused by using muscles during keystrokes.

459 This study emphasizes the significance of assessing not  
460 only muscle activity but also the complementary movements of  
461 wrists and fingers simultaneously when considering muscle  
462 activation and the risks associated with UE-MSDs during  
463 typing.

## 464 **Conflicts of Interest**

465 The authors declare that there are no conflicts of interest.

## 466 **Acknowledgments**

## 467 **References**

468 Alizadehkhayat O, Frostick SP. Electromyographic assessment  
469 of forearm muscle function in tennis players with and without  
470 Lateral Epicondylitis. *Journal of Electromyography and*  
471 *Kinesiology*. 2015;25:876-86.

472 Baker NA, Cham R, Cidboy EH, Cook J, Redfern MS.  
473 Kinematics of the fingers and hands during computer keyboard  
474 use. *Clin Biomech (Bristol, Avon)*. 2007;22:34-43.

475 Bergqvist U, Knave B, Voss M, Wibom R. A longitudinal study  
476 of VDT work and health. *International Journal of Human-  
477 Computer Interaction*. 1992;4:197-219.

478 Cabri J, Sousa JP, Kots M, Barreiros J. Golf-related injuries: A  
479 systematic review. *European Journal of Sport Science*.  
480 2009;9:353-66.

481 Cook JR, Baker NA, Cham R, Hale E, Redfern MS.  
482 Measurements of wrist and finger postures: A comparison of  
483 goniometric and motion capture techniques. *Journal of Applied*  
484 *Biomechanics*. 2007;23:70-8.

485 Cooney WP, Lin GT, An K-N. Improved tendon excursion  
486 following flexor tendon repair. *Journal of Hand Therapy*.

1989;2:102-6.

Dennerlein JT, Johnson PW. Different computer tasks affect the exposure of the upper extremity to biomechanical risk factors. *Ergonomics*. 2006;49:45-61.

Dennerlein JT, Kingma I, Visser B, van Dieen JH. The contribution of the wrist, elbow and shoulder joints to single-finger tapping. *J Biomech*. 2007;40:3013-22.

Eyendaal D, Rahussen FTG, Diercks RL. Biomechanics of the elbow joint in tennis players and relation to pathology. *Br J Sports Med*. 2007;41:820-3.

Feit AM, Weir D, Oulasvirta A. How We Type. *Proceedings of the 2016 CHI Conference on Human Factors in Computing Systems* 2016. p. 4262-73.

Fellinger M, Passler J, Seggl W. Plug-in Gait Reference Guide. *Human and Nonhuman Bone Identification*. 2010:227-46.

Gerr F, Marcus M, Ensor C, Kleinbaum D, Cohen S, Edwards A, et al. A prospective study of computer users: I. Study design and incidence of musculoskeletal symptoms and disorders. *Am J Ind Med*. 2002;41:221-35.

506 Horii E, Lin GT, Cooney WP, Linscheid RL, An KN.  
507 Comparative flexor tendon excursion after passive  
508 mobilization: An in vitro study. Journal of Hand Surgery.  
509 1992;17:559-66.

510 Jonsson B. Measurement and evaluation of local muscular  
511 strain in the shoulder during constrained work. Journal of  
512 human ergology. 1982;11:73-88.

513 Keir PJ, Farias Zuniga A, Mulla DM, Somasundram KG.  
514 Relationships and Mechanisms Between Occupational Risk  
515 Factors and Distal Upper Extremity Disorders. Hum Factors.  
516 2021;63:5-31.

517 Keller K, Corbett J, Nichols D. Repetitive strain injury in  
518 computer keyboard users: Pathomechanics and treatment  
519 principles in individual and group intervention. Journal of Hand  
520 Therapy. 1998;11:9-26.

521 Kuo PL, Lee DL, Jindrich DL, Dennerlein JT. Finger joint  
522 coordination during tapping. J Biomech. 2006;39:2934-42.

523 Marta S, Silva L, Castro MA, Pezarat-Correia P, Cabri J.  
524 Electromyography variables during the golf swing: A literature

525 review. Journal of Electromyography and Kinesiology.  
526 2012;22:803-13.

527 Qin J, Trudeau M, Buchholz B, Katz JN, Xu X, Dennerlein JT.  
528 Joint contribution to fingertip movement during a number entry  
529 task: an application of Jacobian matrix. J Appl Biomech.  
530 2014;30:338-42.

531 Simoneau GG, Marklin RW, Berman JE. Effect of Computer  
532 Keyboard Slope on Wrist Position and Forearm  
533 Electromyography of Typists Without Musculoskeletal  
534 Disorders. Physical Therapy. 2003;83:816-30.

535 Szeto GP, Straker LM, O'Sullivan PB. Examining the low, high  
536 and range measures of muscle activity amplitudes in  
537 symptomatic and asymptomatic computer users performing  
538 typing and mousing tasks. Eur J Appl Physiol. 2009;106:243-  
539 51.

540 Takaoka E, Sugiura M, Komiya H. A study on typist  
541 characterization. IPSJ SIG Technical Report. 2014;No.9:1-14.

542 Visser B, de Korte E, van der Kraan I, Kuijer P. The effect of  
543 arm and wrist supports on the load of the upper extremity

544 during VDU work. Clinical Biomechanics. 2000;15:S34-S8.

545

Table.1 Subjects and Environments

|                                        | Skilled Typist (ST) | Unskilled Typist (UT) | <i>p</i> |
|----------------------------------------|---------------------|-----------------------|----------|
| Number                                 | 5                   | 7                     | —        |
| Correct answers(%)                     | 94.0 (2.3)          | 95.1 (2.6)            | 0.513    |
| WPM <sup>a</sup>                       | 219.5 (21.3)        | 170.6 (36.2)          | *0.033   |
| Age                                    | 21.6 (0.8)          | 20.7 (0.5)            | 0.050    |
| Height (cm)                            | 167.3 (5.0)         | 166.1 (4.2)           | 0.700    |
| Weight (kg)                            | 63.2 (8.9)          | 56.6 (6.4)            | 0.202    |
| Hand width (cm)                        | 7.0 (0.4)           | 6.8 (0.1)             | 0.466    |
| Finger length (cm)                     | 10.2 (0.4)          | 9.9 (0.3)             | 0.305    |
| Chair height (cm)                      | 42.4 (3.9)          | 45.7 (2.8)            | 0.127    |
| Screen angle (°)                       | 129.0(12.4)         | 122.9(17.5)           | 0.552    |
| Male-to-female ratio                   | 3:2                 | 6:1                   | —        |
| Right-left handed ratio                | 5:0                 | 7:0                   | —        |
| Desktop - notebook PC ratio            | 1:4                 | 0:7                   | —        |
| Frequency; PC use times per week       | 5.6 (1.0)           | 4.86 (1.3)            | 0.340    |
| Frequency; PC use times hours per days | 3.8 (1.5)           | 2.93 (1.9)            | 0.445    |

\*  $p < 0.05$ , <sup>a</sup> WPM = Words per minutes

546

547 **Figure legends**

548 **Fig. 1** Experimental equipment.

549 (A) Positions of the markers and EMGs

550 (B) Calculation of MCP joint angle

551 **Fig. 2** Wrist and metacarpophalangeal (MCP) joint motion

552 The error bar represents the standard deviation between the  
553 subjects.

554  $p < 0.05$ , ST = skilled typist, UT = unskilled typist, RMS = root  
555 mean square

556 **Fig. 3** Muscle activation

557 From left to right, the static activity level ( $P = 0.1$ ), mean  
558 activity level ( $P = 0.5$ ), and maximum activity level ( $P = 0.9$ )  
559 are shown.

560 The error bar represents the standard deviation between the  
561 subjects.

562 \*  $p < 0.05$ , FCR (flexor carpi radialis); FCU (flexor carpi  
563 ulnaris); ECR (extensor carpi radialis); ECU (extensor carpi  
564 ulnaris).

565 **Fig. 4** Press time data



566 Data on when the “U” key is pressed. From left to right, the  
 567 wrist joint extension angle, angular velocity, flexion angle of  
 568 the MCP joint of the index finger, angular velocity, and %MVC  
 569 of the FCR, FCU, ECR, and ECU are listed.

570 The error bar represents the standard deviation between the  
 571 subjects.

572 \*  $p < 0.05$

573 **Fig. 5** Data on release time

574 Data on the time between releasing the “U” key and the start of  
 575 the next keystroke. From left to right, the wrist joint extension  
 576 angle, angular velocity, flexion angle of the MCP joint of the  
 577 index finger, angular velocity, and %MVC of FCR, FCU, ECR,  
 578 and ECU are listed.

579 The error bar represents the standard deviation between  
 580 subjects.

581 \*  $p < 0.05$

582

583 **Fig.1**

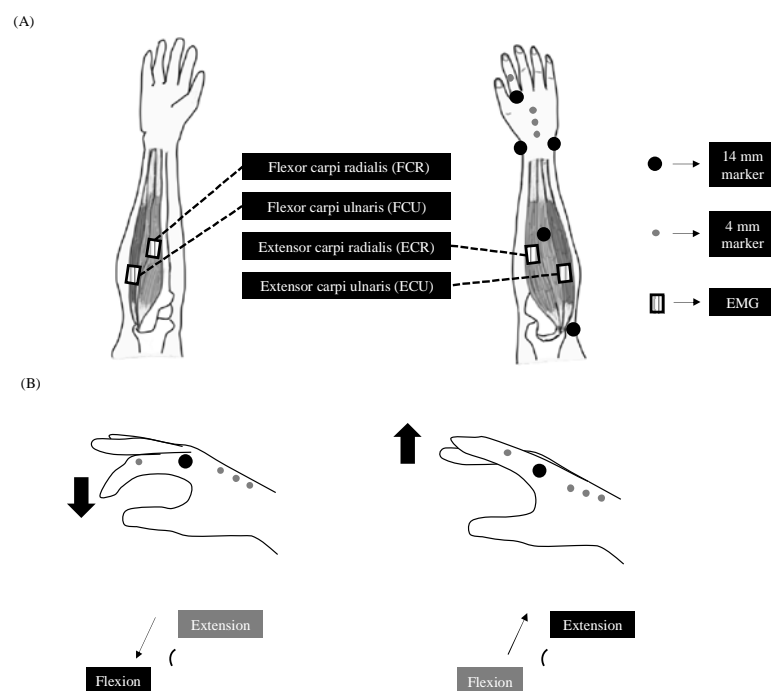

584

585 **Fig.2**

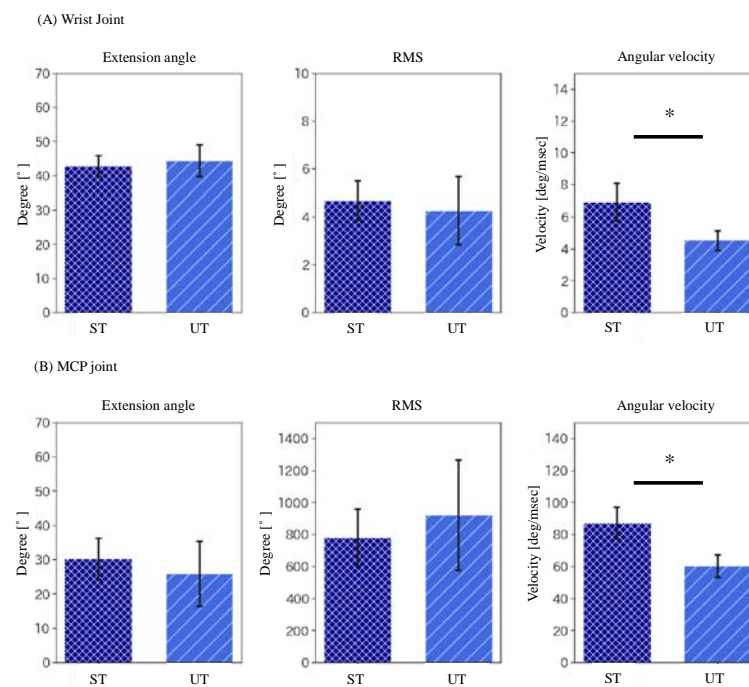

586

587 **Fig.3**

588

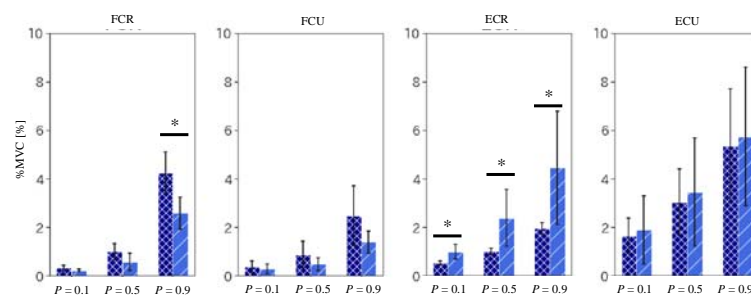

589 **Fig.4**

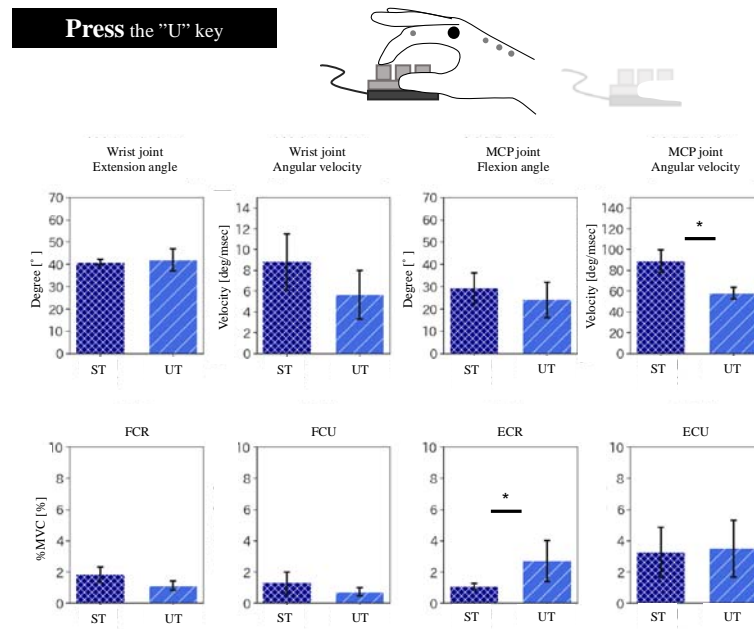

590

591 **Fig.5**

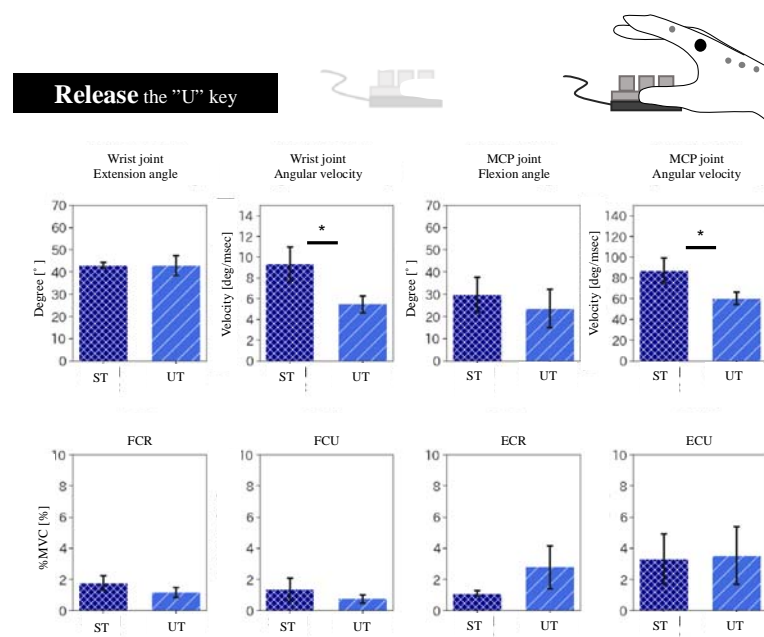

592

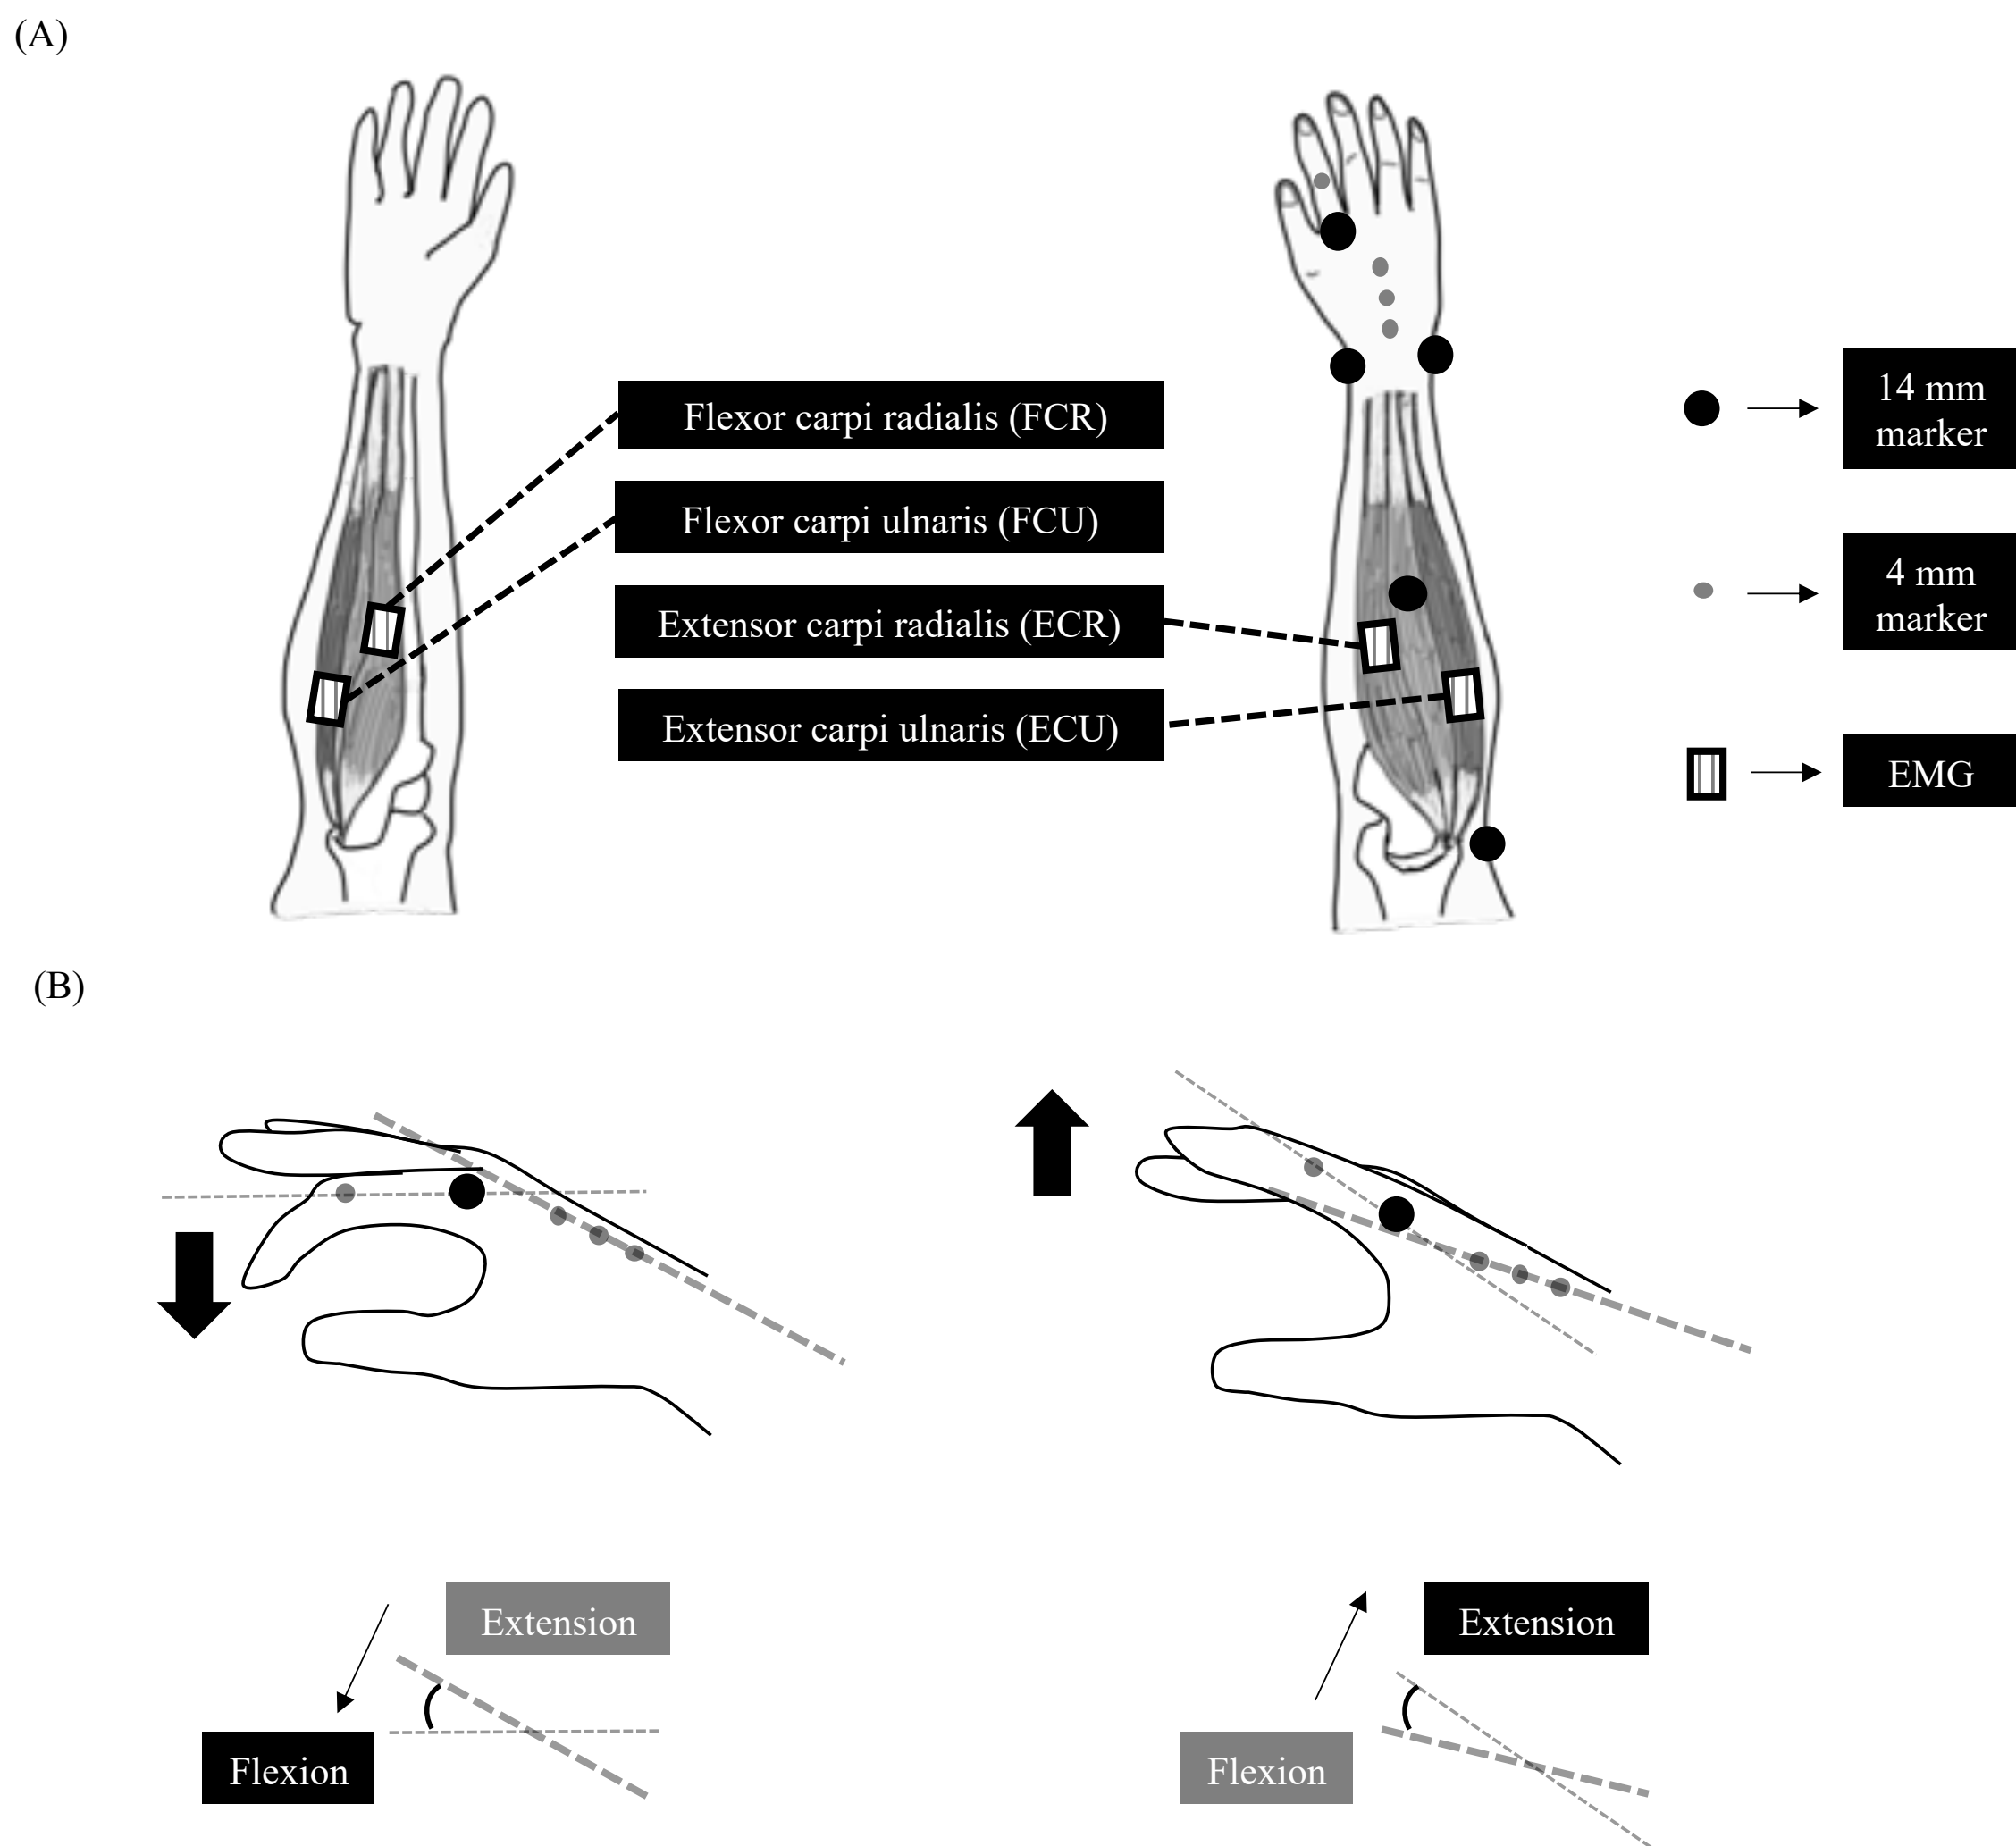

**Fig. 1** Experimental equipment.  
 (A) Positions of the markers and EMGs  
 (B) Calculation of MCP joint angle

(A) Wrist Joint

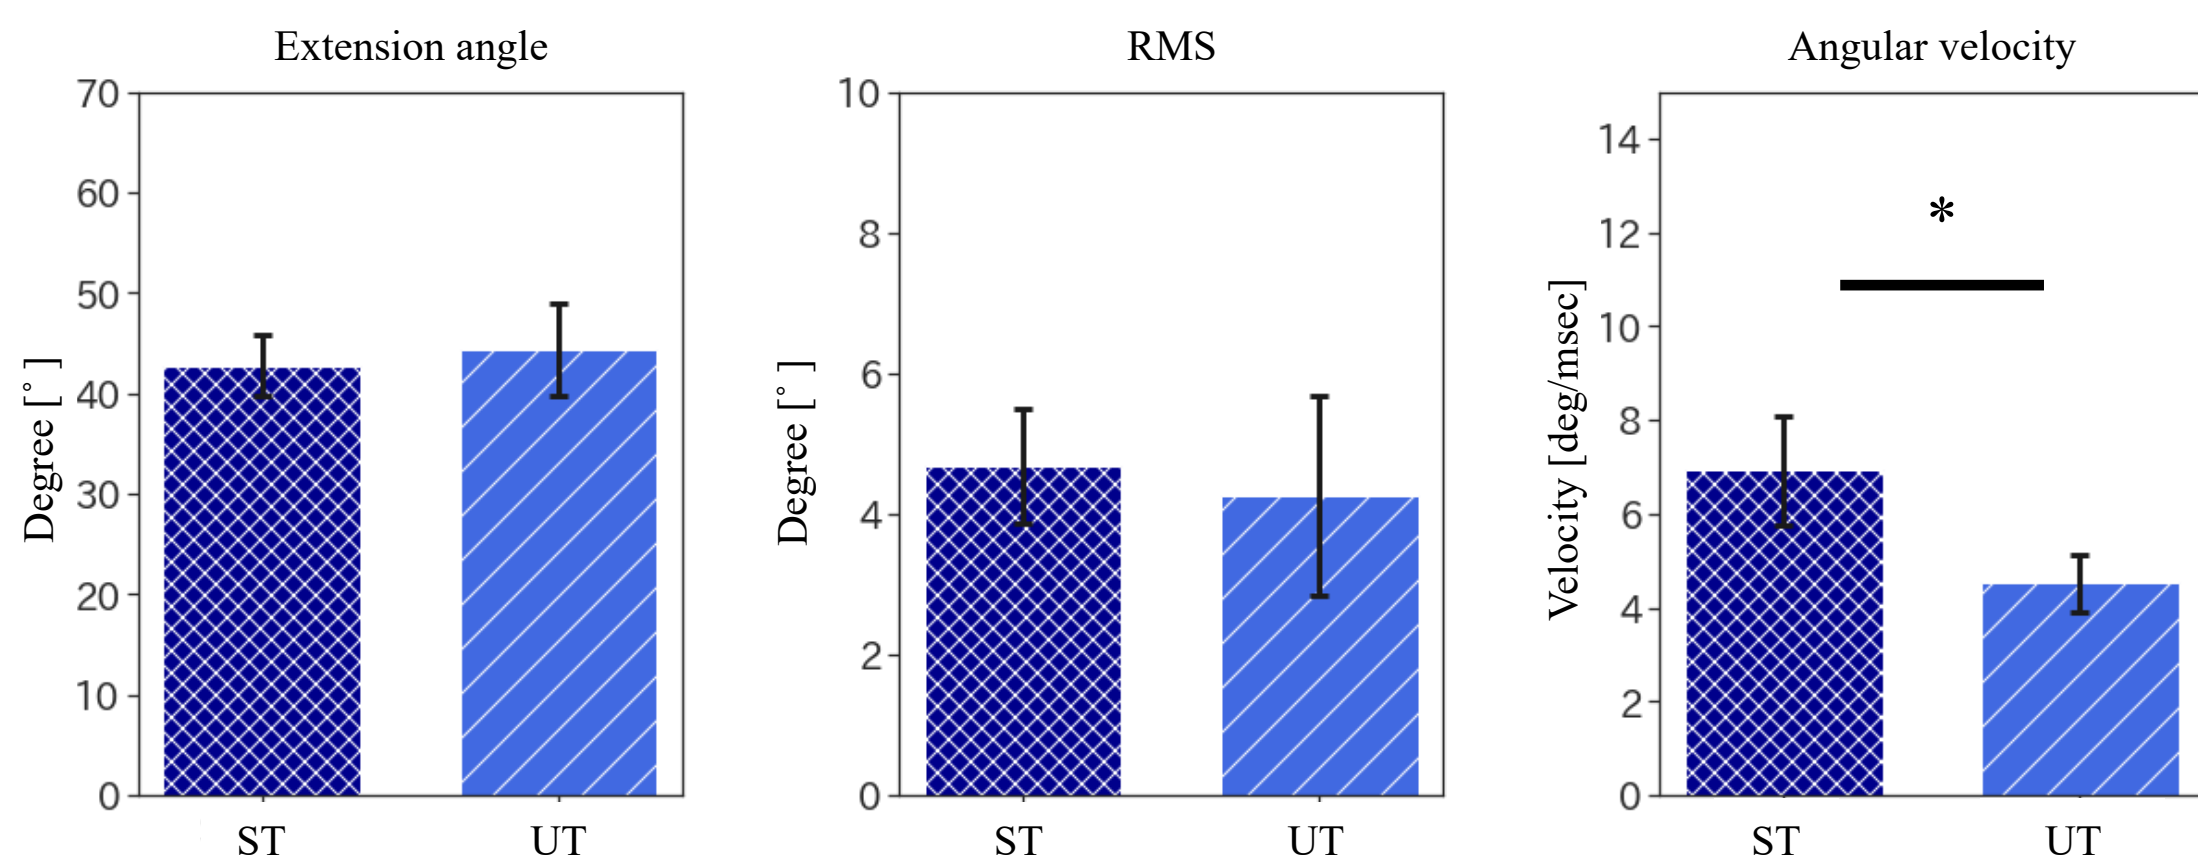

(B) MCP joint

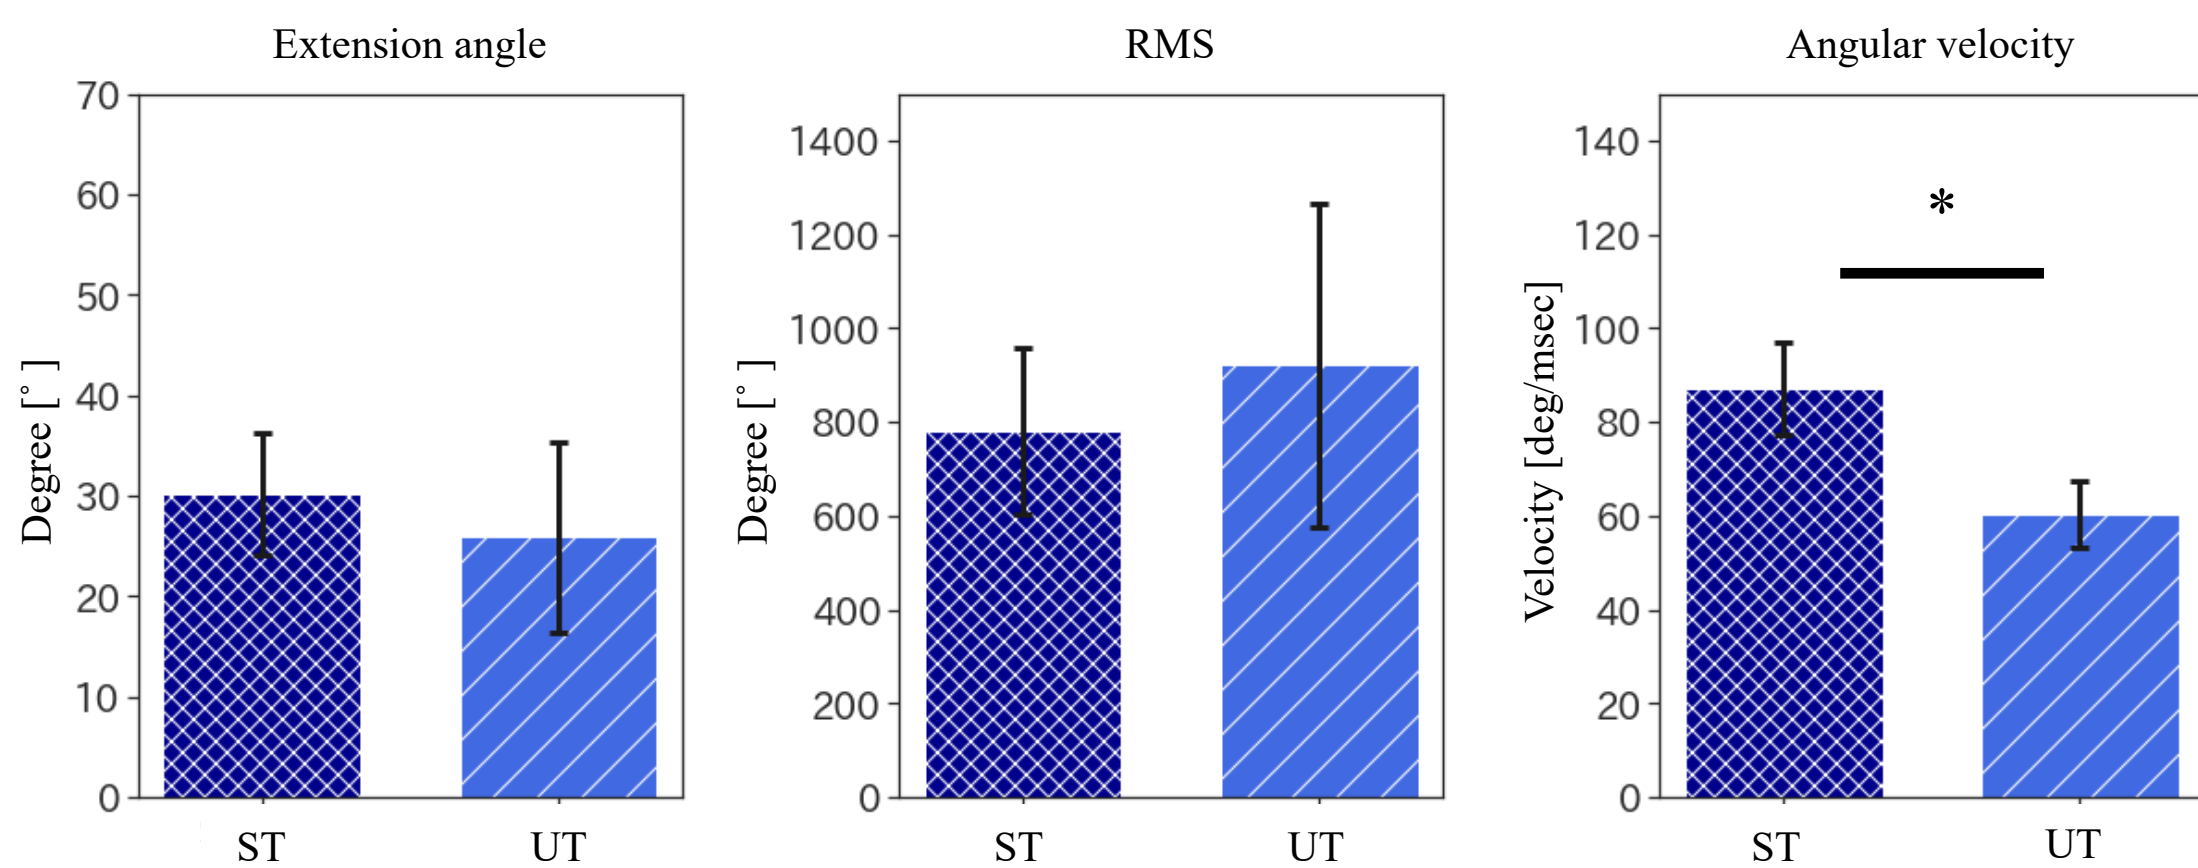

**Fig. 2** Wrist and metacarpophalangeal (MCP) joint motion

The error bar represents the standard deviation between the subjects.

$p < 0.05$ , ST = skilled typist, UT = unskilled typist, RMS = root mean square



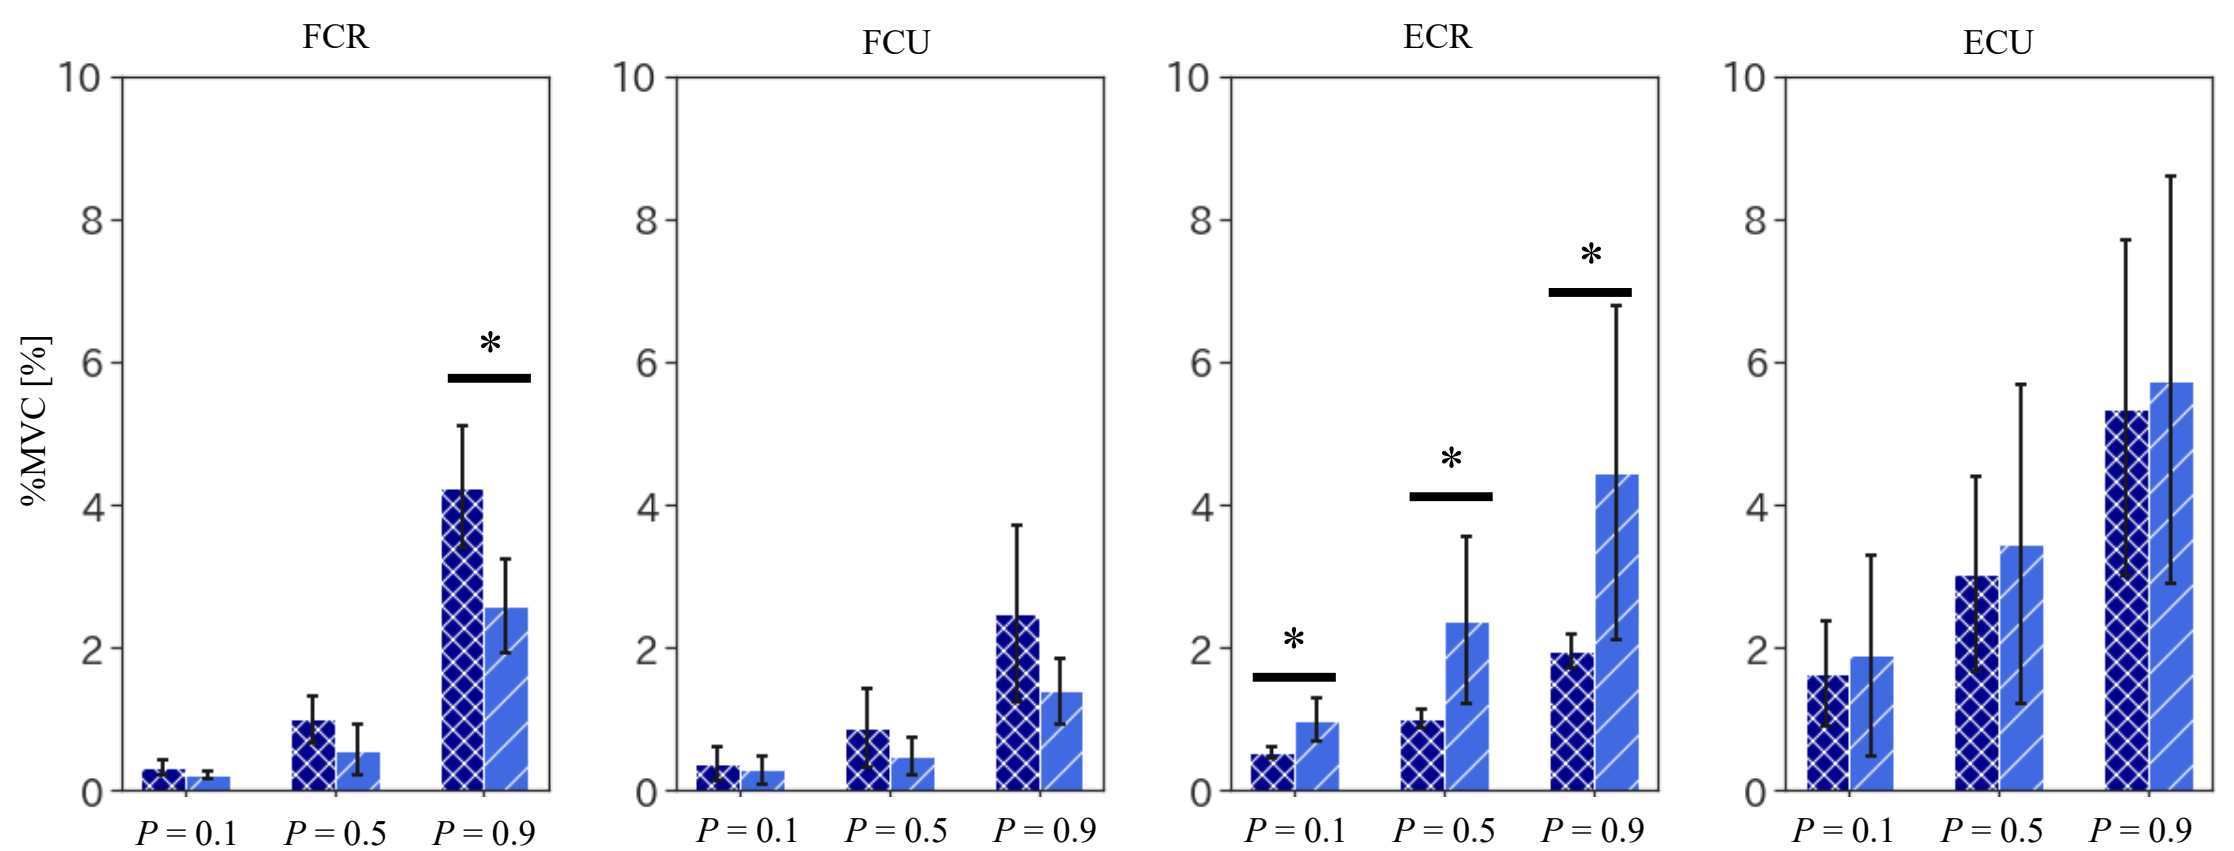

**Fig. 3** Muscle activation

From left to right, the static activity level ( $P = 0.1$ ), mean activity level ( $P = 0.5$ ), and maximum activity level ( $P = 0.9$ ) are shown.

The error bar represents the standard deviation between the subjects.

\*  $p < 0.05$ , FCR (flexor carpi radialis); FCU (flexor carpi ulnaris); ECR (extensor carpi radialis); ECU (extensor carpi ulnaris).

Press the "U" key

Release the "U" key

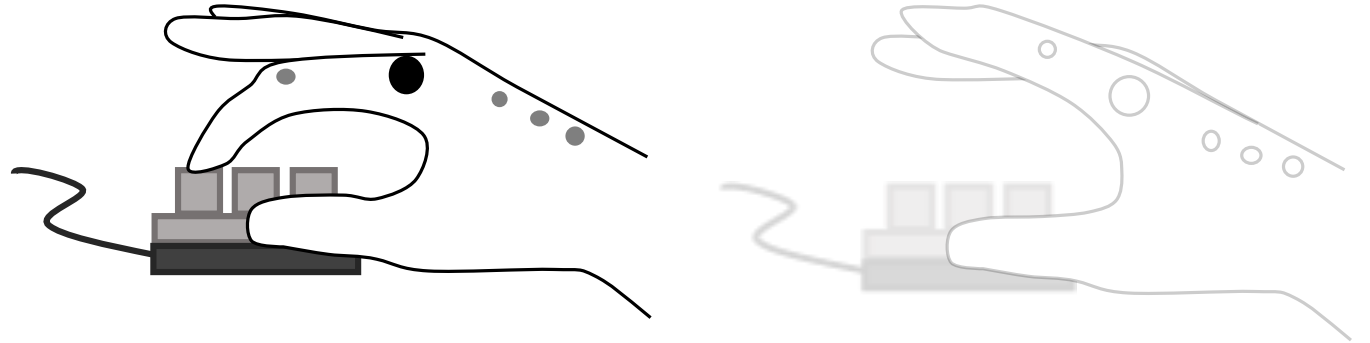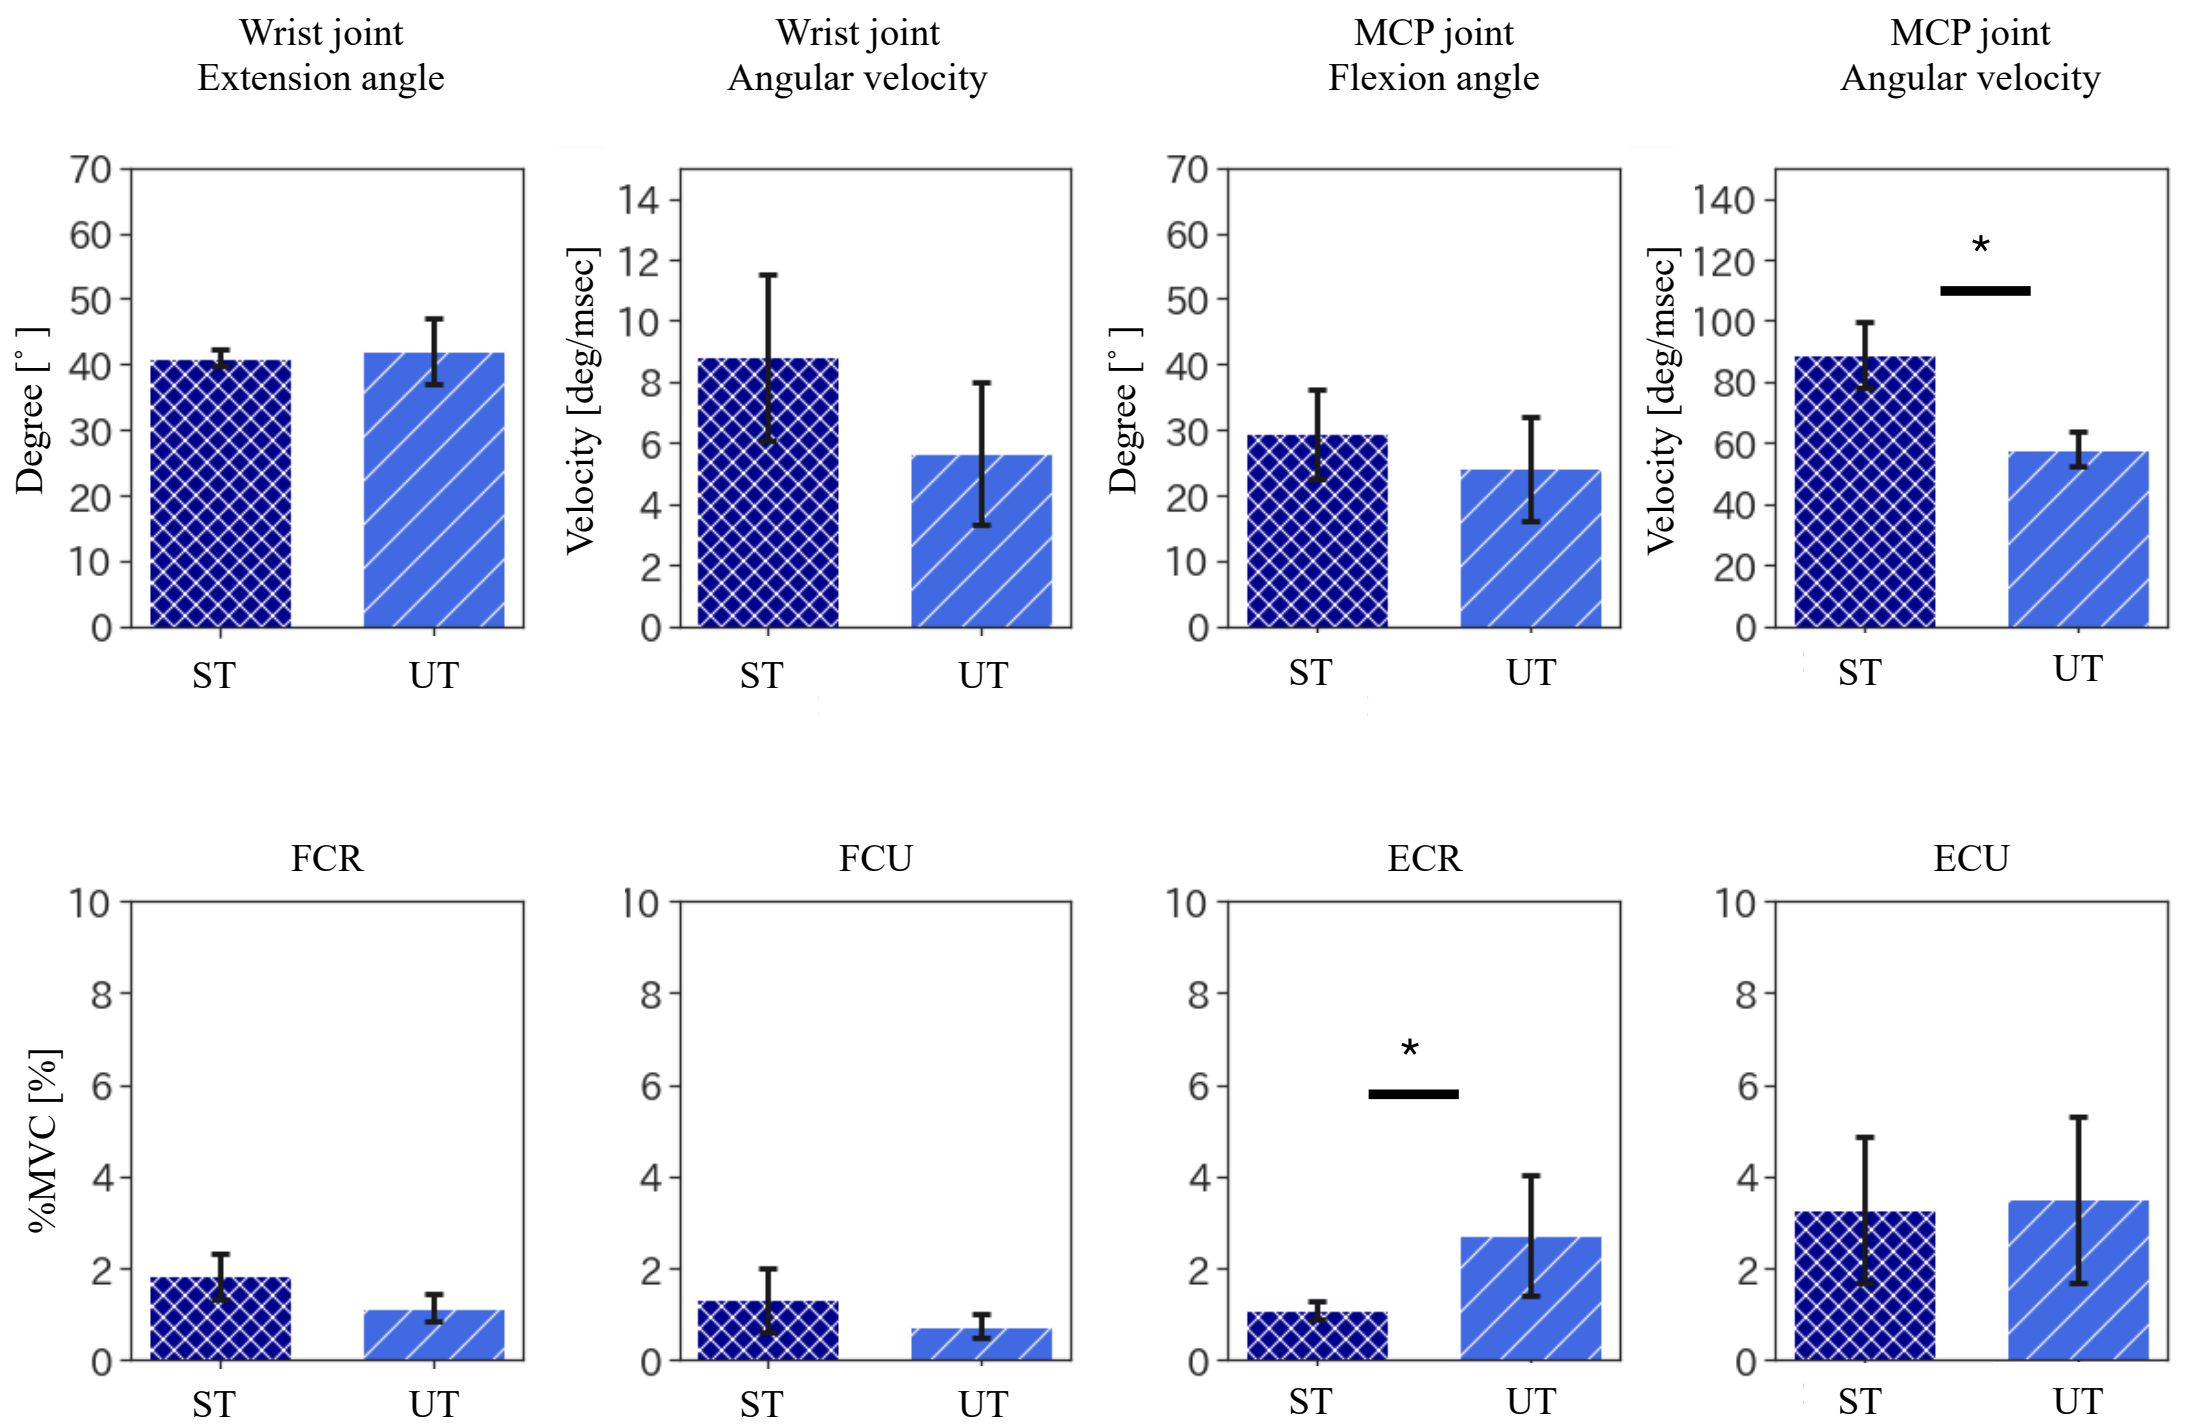

**Fig. 4** Press time data

Data on when the "U" key is pressed. From left to right, the wrist joint extension angle, angular velocity, flexion angle of the MCP joint of the index finger, angular velocity, and %MVC of the FCR, FCU, ECR, and ECU are listed.

The error bar represents the standard deviation between the subjects.

\*  $p < 0.05$

Press the "U" key

Release the "U" key

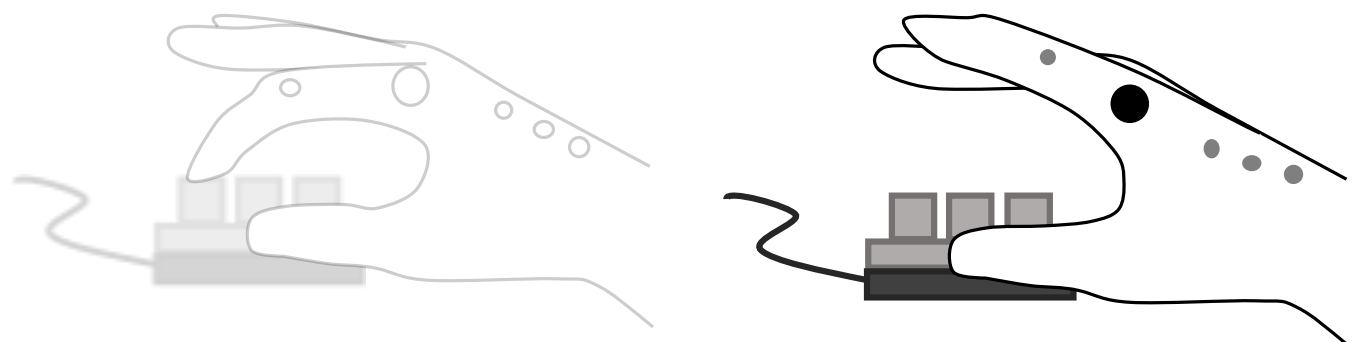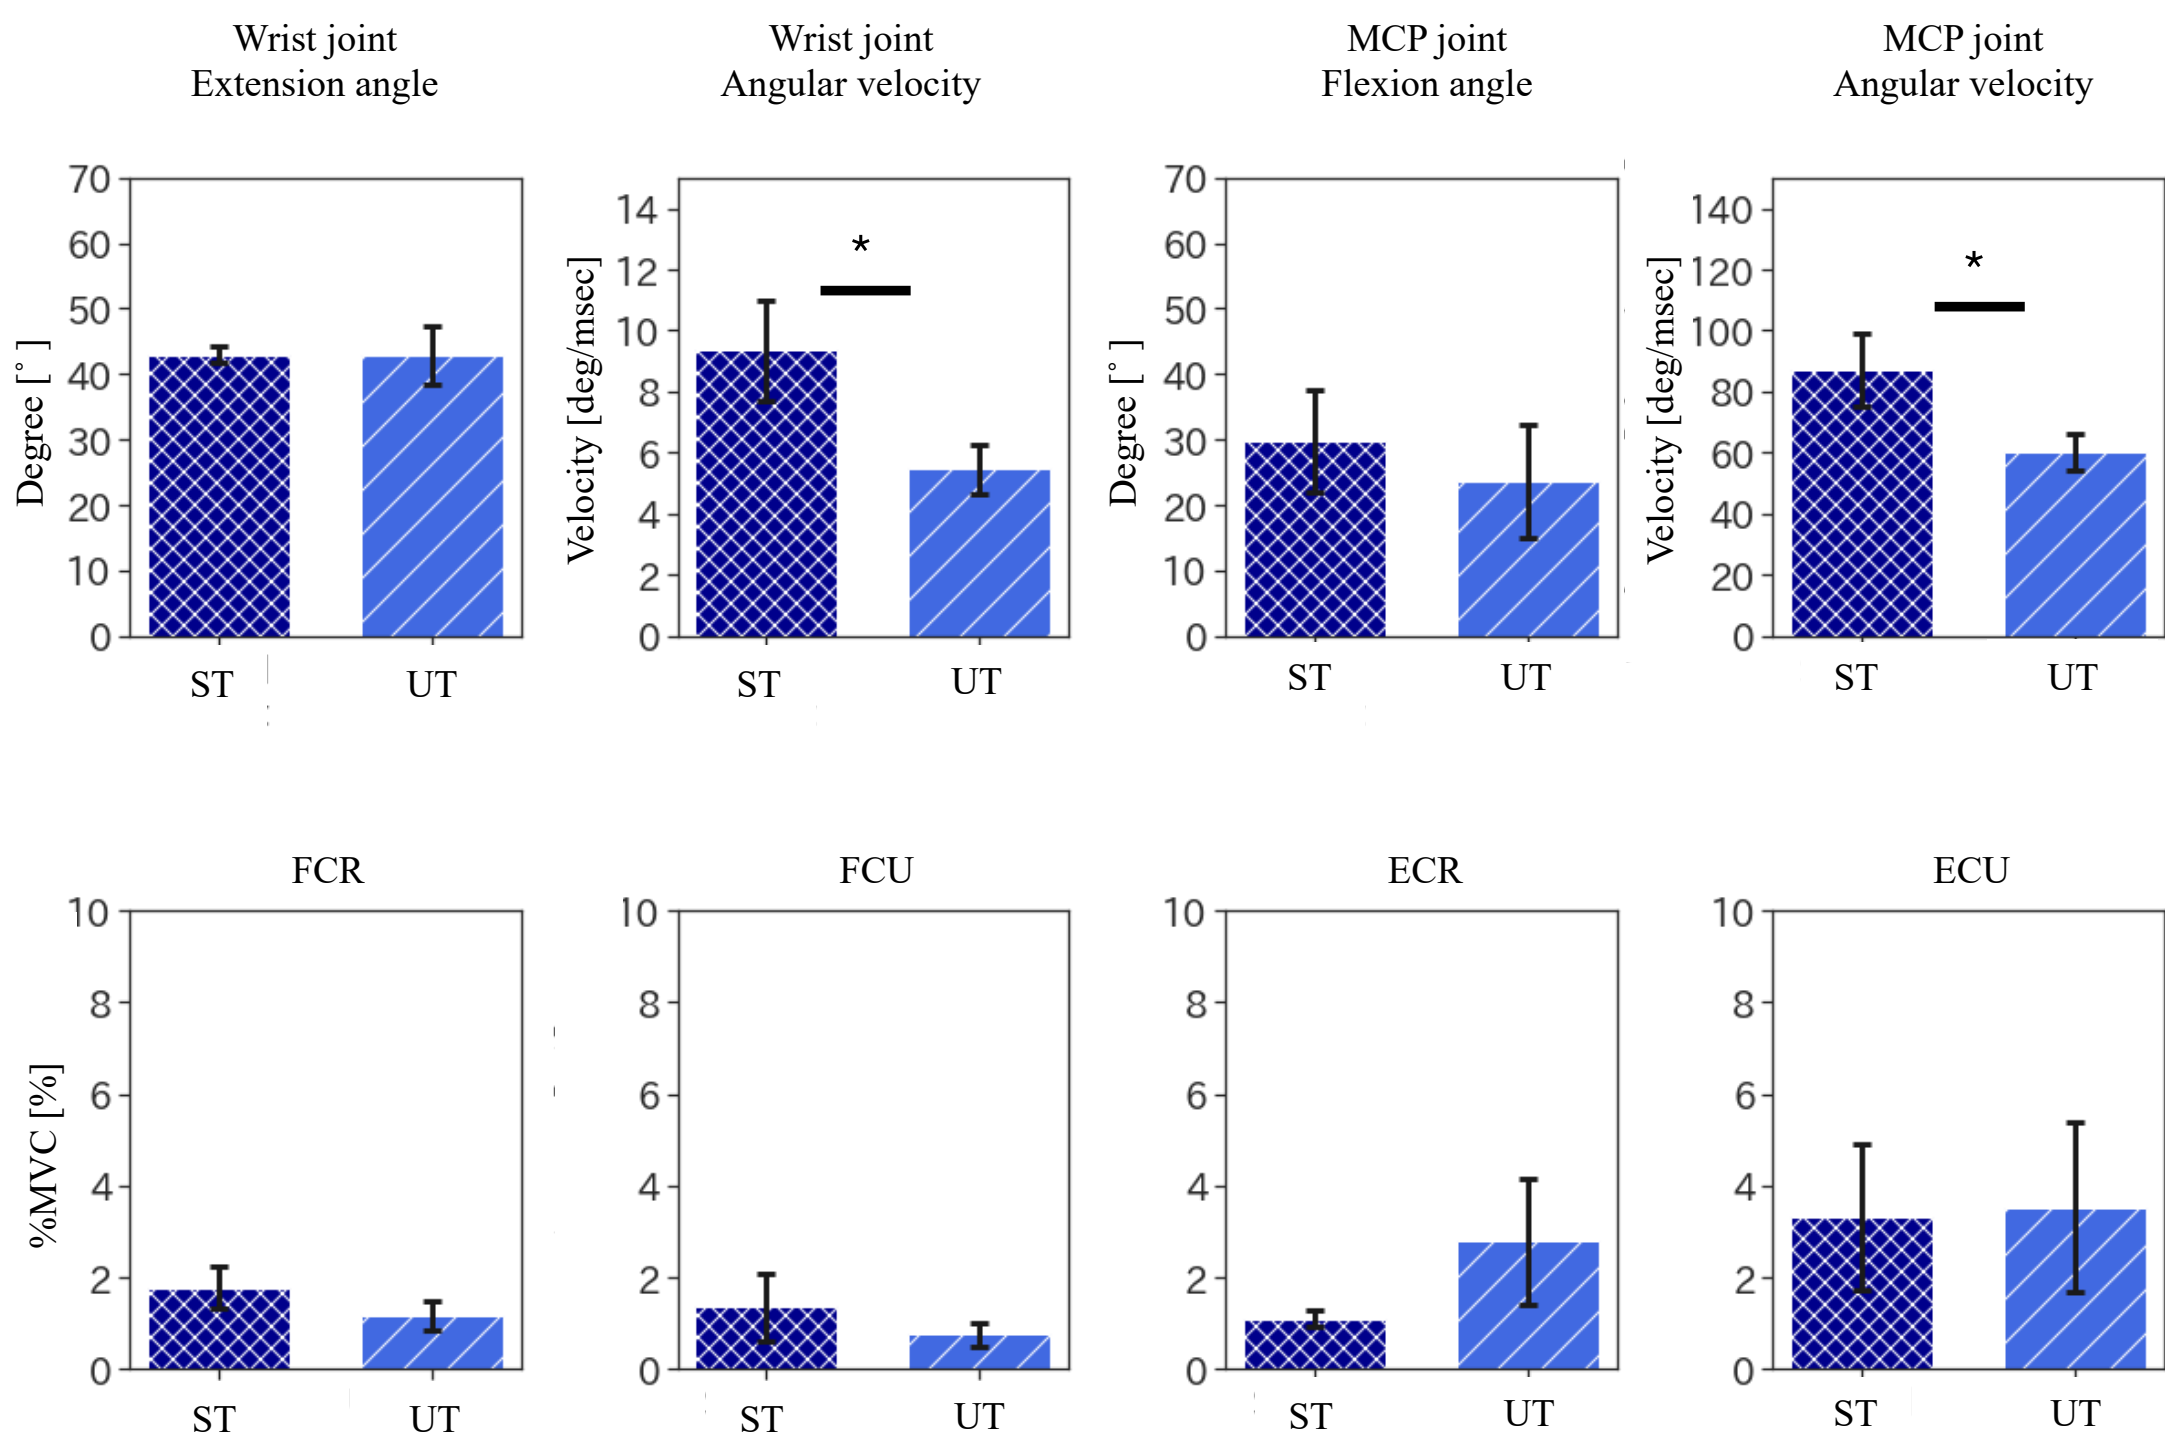

**Fig. 5** Data on release time

Data on the time between releasing the "U" key and the start of the next keystroke. From left to right, the wrist joint extension angle, angular velocity, flexion angle of the MCP joint of the index finger, angular velocity, and %MVC of FCR, FCU, ECR, and ECU are listed. The error bar represents the standard deviation between subjects.

\*  $p < 0.05$

Table.1 Subjects and Environments

|                                           | Skilled Typist (ST) | Unskilled Typist (UT) | <i>p</i> |
|-------------------------------------------|---------------------|-----------------------|----------|
| Number                                    | 5                   | 7                     | —        |
| Correct answers(%)                        | 94.0 (2.3)          | 95.1 (2.6)            | 0.513    |
| WPM <sup>a</sup>                          | 219.5 (21.3)        | 170.6 (36.2)          | *0.033   |
| Age                                       | 21.6 (0.8)          | 20.7 (0.5)            | 0.050    |
| Height (cm)                               | 167.3 (5.0)         | 166.1 (4.2)           | 0.700    |
| Weight (kg)                               | 63.2 (8.9)          | 56.6 (6.4)            | 0.202    |
| Hand width (cm)                           | 7.0 (0.4)           | 6.8 (0.1)             | 0.466    |
| Finger length (cm)                        | 10.2 (0.4)          | 9.9 (0.3)             | 0.305    |
| Chair height (cm)                         | 42.4 (3.9)          | 45.7 (2.8)            | 0.127    |
| Screen angle (°)                          | 129.0(12.4)         | 122.9(17.5)           | 0.552    |
| Male-to-female ratio                      | 3:2                 | 6:1                   | —        |
| Right-left handed ratio                   | 5:0                 | 7:0                   | —        |
| Desktop - notebook PC ratio               | 1:4                 | 0:7                   | —        |
| Frequency; PC use<br>times per week       | 5.6 (1.0)           | 4.86 (1.3)            | 0.340    |
| Frequency; PC use<br>times hours per days | 3.8 (1.5)           | 2.93 (1.9)            | 0.445    |

\*  $p < 0.05$ , <sup>a</sup> WPM = Words per minutes
